# Supplementary material for: Epidemiology and aetiology of maternal parasitic infections in low- and middle-income countries
Source: PubMed Central journal article supplement (PMC3484768), 2011-12
Supplement: jogh-01-189-s001.pdf [file jogh-01-189-s001.pdf]

**Supplementary Table 1.** Summary of data extracted from studies reporting prevalence of maternal malaria infection (n=43)

| Author                  | Country      | Pathogen                     | Prevalence % | Numbers in study | Study setting               | Tests used                    | Study dates              |
|-------------------------|--------------|------------------------------|--------------|------------------|-----------------------------|-------------------------------|--------------------------|
| Gomez et al (25)        | Venezuela    | Malaria                      | 27.4%        | 449              | Hospital                    | 0                             | 2005-2006                |
| Bouyou-Akote et al (26) | Gabon        | Malaria: maternal peripheral | 34.40%       |                  | Hospital                    |                               |                          |
|                         |              | Malaria: placental           | 53.60%       |                  |                             |                               |                          |
|                         |              | Malaria: cord blood          | 18.20%       |                  |                             |                               |                          |
| Akanbi et al (27)       | Nigeria      | Malaria                      | 41.80%       | 262              | Antenatal clinic            | Thick blood smears            | 2009                     |
| Chagas et al (28)       | Brazil       | Malaria: P. falciparum,      | 20.56%       | 417              | Rural clinic                | 0                             | 2009                     |
|                         |              | P. vivax                     | 78.69%       |                  |                             |                               |                          |
|                         |              | Cases where both are present | 0.75%        |                  |                             |                               |                          |
| Aribodor et al (29)     | Nigeria      | Malaria                      | 64.40%       | 500              | No information              | Giemsa stain and microscopy   | 2005-2006                |
| Adam et al (30)         | Sudan        | Malaria: acute infection     | 5.50%        | 236              | Hospital                    | 0                             | 2009                     |
|                         |              | Malaria: chronic infection   | 2.10%        |                  |                             |                               |                          |
| Nwonwu et al (31)       | Nigeria      | Malaria                      | 29.00%       | 198              | Tertiary health institution | 0                             | 2009                     |
| Clerk et al (32)        | Ghana        | Malaria                      | 47.00%       | 3642             | Antenatal clinic            | Giemsa stain and microscopy   | June 2004 and July 2006. |
| Kabanywany et al (33)   | Tanzania     | Malaria                      | 8.00%        | 413              | Hospital                    | 0                             | 2008                     |
| Uneke et al (34)        | Nigeria      | Malaria                      | 19.70%       | 300              | No information              | Histidine-rich proteins-2 RDT | 2008                     |
| Parekh et al (35)       | Peru         | Malaria 2004                 | 8.10%        | 1463             | Tertiary health institution | Giemsa stain and microscopy   | 2004 and 2005.           |
|                         |              | Malaria 2005                 | 6.60%        |                  |                             |                               |                          |
| Coulibaly et al (36)    | Burkina Faso | Malaria                      | 32.20%       | 295              | Antenatal clinic            | Giemsa stain and microscopy   | May-07                   |
|                         |              | Malaria                      | 11.80%       | 288              | Antenatal clinic            | Giemsa stain and              | Dec-07                   |

|                          |          |                                  |                                 |                    |                  |                                                                            |                              |
|--------------------------|----------|----------------------------------|---------------------------------|--------------------|------------------|----------------------------------------------------------------------------|------------------------------|
|                          |          |                                  |                                 |                    |                  | microscopy                                                                 |                              |
| Tarimo et al (37)        | Tanzania | Malaria                          | 23.70%                          | 395                | Antenatal clinic | Blood smear                                                                | 2007                         |
| Lukuka et al (38)        | Congo    | Malaria (Plasmodium falciparum)  | 21.00%                          | 196                | Antenatal clinic | Giemsa stain and microscopy                                                | September and November 2004  |
| Idowu et al (39)         | Nigeria  | Malaria                          | 57.40%                          | 466                | Hospital         |                                                                            | 2006                         |
| Mockenhaupt et al (40)   | Ghana    | Malaria                          | 19.00%                          | 839                | No information   | Microscopy                                                                 | 2006                         |
|                          |          |                                  | 34.00%                          |                    |                  | HRP2 test                                                                  |                              |
|                          |          |                                  | 54.00%                          |                    |                  | PCR                                                                        |                              |
| Malhotra et al (41)      | Kenya    | Malaria (Falciparum malaria)     | 10.40%                          | 632                | Hospital         | RTQ-PCR                                                                    | 2006                         |
| Bassiouny et al (42)     | Yemen    | Malaria                          | 6.16%                           | 276                | Hospital         | Giemsa stain and microscopy                                                | March–August 2001            |
| Adam et al (43)          | Sudan    | Malaria                          | 11.90%                          | 142                | No information   | Microscopy                                                                 | August 2003 and July 2004    |
|                          |          |                                  | 32.00%                          | .                  |                  | PCR                                                                        |                              |
| Mwapasa et al (44)       | Malawi   | Malaria                          | 24.30%                          | 480 (HIV positive) | Hospital         | Placental histopathology                                                   | 2004                         |
| Elghazali et al (45)     | Sudan    | Malaria                          | 13.70%                          | 744                | Antenatal clinic | Giemsa stain and microscopy                                                | October 2003-May 2004        |
| Bouyou-Akotet et al (46) | Gabon    | Malaria                          | 57.00%                          | 311                | Hospital urban   | Thick blood smears                                                         | April 1995 to September 1996 |
| Assabri et al (47)       | Yemen    | Malaria                          | 55.00%                          | 260                | No information   | Thick and thin blood films<br>Giemsa stains and microscopy                 | 2002                         |
| van Eijk et al (48)      | Kenya    | Placental malaria                | 19.00%                          | 5093               | Antenatal clinic | Thick and thin blood films<br>Giemsa stains and microscopy                 | June 1996 and March 1999     |
|                          | .        | Maternal peripheral parasitaemia | 15.20%                          |                    |                  |                                                                            |                              |
| Zhou et al (49)          | Cameroon | Malaria                          | 26% (1st 3 months of pregnancy) | 719                | Rural            | Blood thick and thin films were prepared, stained with Diff-Quick reagents | 1995–1998                    |
|                          |          |                                  | 9% (1st 3 months of pregnancy)  |                    | City             |                                                                            |                              |

|                    |            |                       |                                              |                |                  |                                                            |                       |
|--------------------|------------|-----------------------|----------------------------------------------|----------------|------------------|------------------------------------------------------------|-----------------------|
|                    |            |                       | 50% (4th month of pregnancy)                 |                | Rural            |                                                            |                       |
|                    |            |                       | 20% (4th month of pregnancy)                 |                | City             |                                                            |                       |
| Cot,M et al (50)   | Madagascar | Placental malaria     | 8.10%                                        | 2989           | Hospital         | Thick and thin blood films<br>Giemsa stains and microscopy | June 1996 to May 1997 |
| Singh et al (51)   | India      | Malaria               | 55% (88% Plasmodium falciparum, 12% P.Vivax) |                | Antenatal clinic | No information                                             | 1997-1998             |
| Tobian et al (52)  | Kenya      | Malaria               |                                              | 102            | No information   |                                                            | 2000                  |
|                    |            | Plasmodium falciparum | 3.4% (maternal peripheral blood)             |                |                  | PCR                                                        |                       |
|                    |            |                       | 0% (maternal peripheral blood)               |                |                  | Microscopy                                                 |                       |
|                    |            |                       | 48% maternal-blood samples                   |                |                  | PCR                                                        |                       |
|                    |            |                       | 25% maternal-blood samples                   |                |                  | PCR                                                        |                       |
|                    |            |                       | 24% maternal-blood samples                   |                |                  | PCR                                                        |                       |
|                    |            | Plasmodium falciparum | 32% cord-blood samples                       |                |                  | PCR                                                        |                       |
|                    |            | Plasmodium malariae   | 23% cord-blood samples                       |                |                  | PCR                                                        |                       |
|                    |            | Plasmodium ovale      | 21% cord-blood samples                       |                |                  | PCR                                                        |                       |
| Kasumba et al (53) | Uganda     | Malaria               | 8.6% peripheral blood                        | No information | Hospital         | Smear                                                      | 2000                  |
|                    |            |                       | 6.7% placental blood                         |                |                  |                                                            |                       |
| Singh et al        | India      | Malaria               | 17.6%                                        | 456            | Rural            | 0                                                          | 2005                  |

|                         |              |                       |                                                      |      |                  |                                                                        |                                  |
|-------------------------|--------------|-----------------------|------------------------------------------------------|------|------------------|------------------------------------------------------------------------|----------------------------------|
| (54)                    |              |                       | (plasmodium falciparum 64% and Plasmodium vivax 36%) |      |                  |                                                                        |                                  |
| Egwunyenga et al (55)   | Nigeria      | Malaria               | 21.6% (plasmodium falciparum)                        | 1095 | Hospital         |                                                                        |                                  |
| Steketee et al (56)     | Malawi       | Malaria               | 44.50%                                               | 4127 | Antenatal clinic | Blood smear                                                            | 1996                             |
| Okonofua et al (57)     | Nigeria      | Malaria               | 12.00%                                               | 91   | Antenatal clinic | Blood smear                                                            | 1996                             |
| Singh et al (58)        | India        | malaria               | 0.00%                                                | 145  | No information   |                                                                        | 1995                             |
| Gazin et al (59)        | Burkina Faso | Malaria (high season) | 6.50%                                                | 1040 | Hospital         |                                                                        | 1994                             |
|                         |              | Malaria (low season)  | 24.50%                                               |      |                  |                                                                        |                                  |
| Singh et al (58)        | India        | Malaria               | 55.00%                                               | 274  | No information   |                                                                        | 1997-1998 (malaria epidemic)     |
| Ibhanesebhor et al (60) | Nigeria      | Malaria               | 45.19%                                               | 312  | No information   | Placental smear                                                        | August 1989 and November 1989    |
| Bako et al (61)         | Nigeria      | Malaria               | 33.90%                                               | 437  | Hospital         | Placental histology, Maternal packed cell volume and thick blood films | 24 July 2007 and 12 January 2008 |
| Agomo et al (62)        | Nigeria      | Malaria               | 7.70%                                                | 1084 | No information   | Blood smears stained with Giemsa                                       | 2009                             |
| Kayentao et al (63)     | Mali         | Malaria               | 17.10%                                               | 261  | No information   | 0                                                                      | 2007                             |
|                         |              |                       | 42.30%                                               | 192  | No information   |                                                                        |                                  |
| N'Dao et al (64)        | Senegal      | Malaria               | 9.50%                                                | 8270 | Urban hospital   | 0                                                                      | August 1998 to December 1999     |
| Akum et al (65)         | Cameroon     | Malaria               | 7.8% cord                                            | 770  | No information   | Light microscopy using blood samples                                   | June 1999 and September 2001     |
|                         |              |                       | 32.8% maternal blood                                 |      |                  |                                                                        |                                  |

|                                 |       |         |                                |     |                |                    |      |
|---------------------------------|-------|---------|--------------------------------|-----|----------------|--------------------|------|
|                                 |       |         | 33.7%<br>placental<br>biopsies |     |                |                    |      |
| Bouyou-<br>Akotet et al<br>(46) | Gabon | Malaria | 57.00%                         | 311 | No information | Thick blood smears | 2003 |
