# Supplementary material for: Epidemiology and aetiology of maternal parasitic infections in low- and middle-income countries
Source: PubMed Central journal article supplement (PMC3484768), 2011-12
Supplement: jogh-01-189-s002.pdf [file jogh-01-189-s002.pdf]

**Supplementary Table 2.** Summary of data extracted from studies reporting prevalence of maternal infection with helminths (n=14)

| Author                      | Country  | Pathogen                                                       | Prevalence                           | Number in study | Study setting    | Test used                                                          | Date of study                 |
|-----------------------------|----------|----------------------------------------------------------------|--------------------------------------|-----------------|------------------|--------------------------------------------------------------------|-------------------------------|
| Patana et al (10)           | Zimbabwe | Schistosoma haematobium and Schistosoma mansoni                | 50.00%                               | 299             | Antenatal clinic | Urine and stool specimens for Schistosoma and 5ml of blood for HBV | 0                             |
|                             |          | HBV                                                            | 2.00%                                |                 |                  |                                                                    |                               |
| Adegnika et al (11)         | Gabon    | Ascaris lumbricoides                                           | 45.5% pregnant vs 32.5% non-pregnant | 210             | Hospital         | Stool samples examined using the Kato-Katz technique               | October 2003 and January 2004 |
|                             |          | Trichuris trichiura                                            | 31% pregnant vs 12.5% non-pregnant   |                 |                  |                                                                    |                               |
| Muhangi et al (12)          | Uganda   | Hookworm                                                       | 44.50%                               | 2507            | Antenatal clinic | Kato–Katz method and charcoal culture for Strongyloides            | April 2003 and November 2005. |
|                             |          | Mansonella perstans                                            | 21.30%                               |                 |                  |                                                                    |                               |
|                             |          | Schistosoma mansoni                                            | 18.30%                               |                 |                  |                                                                    |                               |
|                             |          | Strongyloides                                                  | 12.30%                               |                 |                  |                                                                    |                               |
|                             |          | Trichuris                                                      | 9.10%                                |                 |                  |                                                                    |                               |
|                             |          | Ascaris                                                        | 2.30%                                |                 |                  |                                                                    |                               |
|                             |          | Asymptomatic Plasmodium Falciparum Parasitaemia                | 10.90%                               |                 |                  |                                                                    |                               |
|                             |          | HIV                                                            | 11.90%                               |                 |                  |                                                                    |                               |
| Shah et al (13)             | Nepal    | Hookworm                                                       | 46.50%                               | 112             | Antenatal clinic | Light microscopy of stool samples                                  | May 2001 to July 2001         |
| Ozumba et al (14)           | Nigeria  | Helminthic infection (the two below only two types identified) | 11.80%                               | 161             | Antenatal clinic | Kato thick smear technique                                         | July and December 2000        |
|                             |          | Ascaris lumbricoides                                           | 8.70%                                |                 |                  |                                                                    |                               |
|                             |          | Trichuris trichuria                                            | 3.10%                                |                 |                  |                                                                    |                               |
| Rodriguez-Garcia et al (15) | Mexico   | Giardia lamblia                                                | 65.80%                               | 207             | No information   | Faust's method with 3 stool samples                                | 0                             |
|                             |          | Ascaris lumbricoides                                           | 13.90%                               |                 |                  |                                                                    |                               |
| Ndibazza et al (16)         | Uganda   | hookworm                                                       | 45.00%                               | 2507            | Hospital         | Kato-Katz method for ova and with use of charcoal culture for      | April 2003 through            |

|                          |                    |                           |              |      |           |                                                                                                                                                                  |                                         |
|--------------------------|--------------------|---------------------------|--------------|------|-----------|------------------------------------------------------------------------------------------------------------------------------------------------------------------|-----------------------------------------|
|                          |                    |                           |              |      |           | Strongyloides species                                                                                                                                            | November 2005                           |
|                          |                    | Schistosoma mansoni       | 18.00%       |      |           |                                                                                                                                                                  |                                         |
| Liabsuetrakul et al (17) | Thailand           | Ascaris                   | 10.30%       | 1063 | Hospital  |                                                                                                                                                                  |                                         |
|                          |                    | Hookworm                  | 5.70%        |      |           |                                                                                                                                                                  |                                         |
|                          |                    | Trichuris                 | 6.30%        |      |           |                                                                                                                                                                  |                                         |
| van Eijk et al (18)      | Kenya              | Ascaris lumbricoides      | 52.30%       | 390  | Community | Microscopically examined for geohelminth infection using a modification of the formol-ether and ethyl acetate by concentration technique and by Kato-Katz method | 0                                       |
|                          |                    | Hookworm                  | 39.50%       |      |           |                                                                                                                                                                  |                                         |
|                          |                    | Trichuris trichiura       | 29.00%       |      |           |                                                                                                                                                                  |                                         |
| Navitsky et al (19)      | Nepal              | Hookworm                  | 78.80%       | 292  | Rural     | Kato-Katz method and modified Harada-Mori method                                                                                                                 | June 1995 through July 1996             |
|                          |                    | Ascaris lumbricoides      | 56.20%       |      |           |                                                                                                                                                                  |                                         |
|                          |                    | Trichuris trichiura       | 7.90%        |      |           |                                                                                                                                                                  |                                         |
|                          |                    | Strongyloides stercoralis | 2.00%        |      |           |                                                                                                                                                                  |                                         |
| Guerra et al (20)        | Brazil             | Ascaris lumbricoides      | 19.00%       | 481  | Urban     |                                                                                                                                                                  | April to October of 1988                |
|                          |                    | ancilostomideos           | 16.70%       |      |           |                                                                                                                                                                  |                                         |
|                          |                    | Trichuris trichiura       | 15.90%       |      |           |                                                                                                                                                                  |                                         |
| Brooker et al (21)       | Sub-Saharan Africa | Hookworm                  | 37.7 million |      |           | GPW3.0b population estimates and country-specific age- sex structures                                                                                            | 0                                       |
| Egwunye nga et al (22)   | Nigeria            | Malaria parasites         | 816 (38.8%)  | 2014 | Hospital  | Kato-Katz Method                                                                                                                                                 | 1st February 1997 and 31st January 1998 |
|                          |                    | Ascaris lumbricoides      | 19.10%       |      |           |                                                                                                                                                                  |                                         |
|                          |                    | Hookworm                  | 14.20%       |      |           |                                                                                                                                                                  |                                         |
|                          |                    | Trichuris trichiura       | 7.00%        |      |           |                                                                                                                                                                  |                                         |
|                          |                    | Schistosoma mansoni       | 3.40%        |      |           |                                                                                                                                                                  |                                         |
|                          |                    | Enterobius vermicularis   | 2.00%        |      |           |                                                                                                                                                                  |                                         |

|                   |         |                 |        |    |          |                  |   |
|-------------------|---------|-----------------|--------|----|----------|------------------|---|
|                   |         | Hymenolepis sp. | 1.60%  |    |          |                  |   |
|                   |         | Taenia sp.      | 1.00%  |    |          |                  |   |
| Weigel et al (23) | Ecuador | E.Histolytica   | 80.00% | 91 | Hospital | Kato-Katz Method | 0 |
|                   |         | E.Coli          | 62.00% |    |          |                  |   |
|                   |         | Giardia         | 22.00% |    |          |                  |   |
|                   |         | Ascaris         | 21.00% |    |          |                  |   |
|                   |         | Trichuris       | 5.00%  |    |          |                  |   |
