# Supplementary material for: Epidemiology and aetiology of maternal parasitic infections in low- and middle-income countries
Source: PubMed Central journal article supplement (PMC3484768), 2011-12
Supplement: jogh-01-189-s003.pdf [file jogh-01-189-s003.pdf]

**Supplementary Table 3.** Summary of data extracted from studies reporting prevalence of maternal infection with *Toxoplasma gondii* (n=49)

| Author                       | Pathogen   | Country  | Prevalence %                          | Numbers in study                       | Study setting    | Tests used                                                                                            | Duration of study          |
|------------------------------|------------|----------|---------------------------------------|----------------------------------------|------------------|-------------------------------------------------------------------------------------------------------|----------------------------|
| Wanachiwanawin et al (66)    | Toxoplasma | Thailand |                                       | 1669 838 HIV positive 831 HIV negative | Antenatal clinic | Solid-phase enzyme-linked immunosorbent assay for IgG and capture antibody enzyme immunoassay for IgM | 2001                       |
|                              | IgG        |          | 53.7% HIV seropositive                |                                        |                  |                                                                                                       |                            |
|                              | IgG        |          | 5.3% non-HIV infected                 |                                        |                  |                                                                                                       |                            |
|                              | IgM        |          | 0.67% of IgG positive in HIV positive |                                        |                  |                                                                                                       |                            |
|                              | IgM        |          | 4.5% of IgG positive in HIV negative  |                                        |                  |                                                                                                       |                            |
| Lopes et al (67)             | Toxoplasma | Brazil   |                                       | 492                                    | No information   | Chemiluminescence                                                                                     | 2009                       |
|                              | IgG        |          | 49.20%                                |                                        |                  |                                                                                                       |                            |
|                              | IgM        |          | 1.2% of IgG                           |                                        |                  |                                                                                                       |                            |
| Varella et al (68)           | Toxoplasma | Brazil   | 0.48%                                 | 41112                                  | No information   | 0                                                                                                     | 1998-2005                  |
| Khurana et al (69)           | Toxoplasma | India    |                                       | 300                                    | No information   | ELISA                                                                                                 | 2010                       |
|                              | IgG        |          | 15.30%                                |                                        |                  |                                                                                                       |                            |
|                              | IgM        |          | 3.00%                                 |                                        |                  |                                                                                                       |                            |
| Vaz et al (70)               | Toxoplasma | Brazil   |                                       | 20389                                  | No information   | Immunoenzymatic assays                                                                                | 01 April 2003-31 July 2004 |
|                              | IgG        |          | 53.30%                                |                                        |                  |                                                                                                       |                            |
|                              | IgM        |          | 3.26%                                 |                                        |                  |                                                                                                       |                            |
| Alvarado-Esquivel et al (71) | Toxoplasma | Mexico   |                                       | 439                                    | Rural            | Enzyme-linked immunoassays                                                                            | 2009                       |
|                              | IgG        |          | 8.20%                                 |                                        |                  |                                                                                                       |                            |
|                              | IgM        |          | 2.30%                                 |                                        |                  |                                                                                                       |                            |

|                        |                |          |                      |      |                     |                                           |                                    |
|------------------------|----------------|----------|----------------------|------|---------------------|-------------------------------------------|------------------------------------|
| Maggi et al (72)       | Toxoplasma     | Albania  |                      | 496  | No information      | 0                                         | October 2004 to March 2005         |
|                        | IgG            |          | 48.60%               |      |                     |                                           |                                    |
|                        | IgM            |          | 1.3% of IgG positive |      |                     |                                           |                                    |
| Barbosa et al (73)     | Toxoplasma     | Brazil   | 66.30%               | 190  | No information      | Microparticle enzyme immunoassay          | March to December 2007.            |
|                        | Toxoplasma     | China    |                      | 235  |                     |                                           |                                    |
| Liu et al (74)         | IgG            |          | 10.60%               |      | Antenatal clinic    | ELISA                                     | 2006                               |
|                        | IgM            |          | 0.00%                |      |                     |                                           |                                    |
| Ribeiro et al (75)     | Toxoplasma     | Brazil   |                      | 831  | No information      | 0                                         | 2008                               |
|                        | IgG            |          | 75.10%               |      |                     |                                           |                                    |
|                        | IgM            |          | 2.00%                |      |                     |                                           |                                    |
| Rosso et al (76)       | Toxoplasma     | Colombia |                      | 955  | Healthcare facility | Microparticle enzyme immunoassay          | July 22, 2005 to December 31, 2005 |
|                        | IgG            |          | 45.80%               |      |                     |                                           |                                    |
|                        | IgM            |          | 2.80%                |      |                     |                                           |                                    |
| Abdi et al (77)        | Toxoplasma IgG | Iran     | 44.60%               | 553  | No information      | Indirect immunofluorescence antibody test | 2008                               |
| Lin et al (78)         | Toxoplasma     | Taiwan   |                      | 426  | Hospitals           | ELISA                                     | 2008                               |
|                        | IgG indigenous |          | 40.60%               |      |                     |                                           |                                    |
|                        | IgG Immigrant  |          | 18.20%               |      |                     |                                           |                                    |
|                        | IgM indigenous |          | 2.90%                |      |                     |                                           |                                    |
|                        | IgM Immigrant  |          | 2.20%                |      |                     |                                           |                                    |
| Ndiaye et al (79)      | Toxoplasma     | Senegal  |                      | 109  | No information      | Immunoenzymatic technical in solid phase  | 2002                               |
|                        | IgG            |          | 22.00%               |      |                     |                                           |                                    |
|                        | IgM            |          | 3.00%                |      |                     |                                           |                                    |
| El Mansouri et al (80) | Toxoplasma     | Morocco  | 50.60%               | 2456 | No information      | ELISA                                     | 2007                               |

|                                |                     |            |        |                                           |                  |                                                  |                                |
|--------------------------------|---------------------|------------|--------|-------------------------------------------|------------------|--------------------------------------------------|--------------------------------|
| Castilho-Pelloso et al (81)    | Toxoplasma IgM      |            | 1.07%  | 290                                       | No information   | ELISA                                            | January 2001 to December 2003  |
| Alvarado-Esquivel et al (71)   | Toxoplasma IgG      | Mexico     | 6.10%  | 343                                       | No information   | IMX toxo IgM and IMX toxo IgG 2.0 kits           | 2006                           |
|                                | Toxoplasma IgM      |            | 0.00%  |                                           |                  |                                                  |                                |
| Razzak et al (82)              | Toxoplasma IgM      | Iraq       | 0.97%  | 310                                       | No information   | Enzyme-linked immunofluorescent assay            | July 2002 till September 2003  |
| Spalding et al (83)            | Toxoplasma          | Brazil     | 71.50% | 2126                                      | No information   |                                                  | 2005                           |
| Ndir et al (84)                | Toxoplasma pregnant | Senegal    | 37.10% | 140 (70 pregnant and 70 abortion patient) | No information   | Technical solid-phase enzyme immunoassay         | November 2001 to April 2002    |
|                                | Toxoplasma aborted  |            | 40.00% |                                           |                  |                                                  |                                |
| Buchy et al (85)               | Toxoplasma IgG      | Vietnam    | 11.20% | 300                                       | No information   | 0                                                | 2003                           |
|                                | Toxoplasma IgM      |            | 0.00%  |                                           |                  |                                                  |                                |
| Elnahas et al (86)             | Toxoplasma IgG      | Sudan      | 34.10% | 487                                       | Antenatal clinic | Enzyme linked immunoassay                        | June through to December 2000  |
|                                | Toxoplasma IgM      |            | 14.30% |                                           |                  |                                                  |                                |
| Akoijam et al (87)             | Toxoplasma          | India      | 41.75% | 503                                       | No information   | ELISA                                            | August 1996 and September 1997 |
| Mahdi et al (88)               | Toxoplasma          | Iran       | 49.20% | 254                                       | No information   | 0                                                | 1999                           |
| Rai et al (89)                 | Toxoplasma          | Nepal      | 55.20% | 345                                       | No information   | Microlatex agglutination (MLA) and ELISA methods | 1998                           |
| Chintana et al (90)            | Toxoplasma IgG      | 0          | 13.20% | 1200                                      | No information   | Sabin-feldman dye tes                            | 1998                           |
| Ashrafunnesa Khatun et al (91) | Toxoplasma IgG      | Bangladesh | 38.50% | 286                                       | Antenatal clinic | ELISA                                            | 1988                           |
| Zhang et al (92)               | Toxoplasma          | China      | 7.28%  | 1250                                      | No information   | Indirect hemagglutination (IHA)                  | 1997                           |
| Onadeko et                     | Toxoplasma          | Nigeria    | 75.40% | 0                                         | No               | Dye test on sera                                 | 1996                           |

|                             |                     |            |        |       |                                   |                                                                      |                            |
|-----------------------------|---------------------|------------|--------|-------|-----------------------------------|----------------------------------------------------------------------|----------------------------|
| al (93)                     |                     |            |        |       | information                       |                                                                      |                            |
| Zhang et al (94)            | Toxoplasma IgM      | China      | 3.38%  | 4126  | Perinatal care                    | Capture-EIA                                                          | 1997                       |
| Gonzalez-Morales et al (95) | Toxoplasma          | Cuba       | 70.90% | 0     | No information                    | ELISA                                                                | 1990 and 1991              |
| Galvan Ramirez et al (96)   | Toxoplasma IgG      | Mexico     | 34.90% | 350   | High-risk pregnancies in hospital |                                                                      | 1995                       |
|                             | Toxoplasma IgM      |            | 20.70% |       |                                   |                                                                      |                            |
| Lelong et al (97)           | Toxoplasma          | Madagascar | 83.50% | 599   | No information                    | ELISA                                                                | 1995                       |
| Sun et al (98)              | Toxoplasma IgG      | China      | 39.14% | 1211  | Hospitals                         | ELISA                                                                | 1995                       |
|                             | Toxoplasma IgM      |            | 4.21%  |       |                                   |                                                                      |                            |
| Martinez Sanchez et al (99) | Toxoplasma          | Cuba       | 71.00% | 362   | No information                    | 10 µL ultra micro-ELISA                                              | October 1990 to April 1991 |
| Bari et al (100)            | Toxoplasma IgG      | India      | 46.00% | 320   | No information                    | ELISA                                                                | 1990                       |
|                             | Toxoplasma IgM      |            | 27.70% |       |                                   |                                                                      |                            |
| Natu et al (101)            | Toxoplasma          |            | 19.44% | 499   | No information                    | Indirect haemagglutination test.                                     | 1989                       |
| Zhang et al (102)           | Toxoplasma          | China      | 4.06%  | 6822  | No information                    | Indirect hemagglutination (IHA)                                      | 1989                       |
| Abdel-Hafez et al (103)     | Toxoplasma aborted  | Jordon     | 58.20% | 55    | No information                    | ELISA and indirect immunofluorescent (IIF) test (for aborting woman) | 1986                       |
|                             | Toxoplasma pregnant |            | 26.10% | 46    |                                   |                                                                      |                            |
| Shanmugam et al (104)       | Toxoplasma          | India      | 23.60% | 225   | Antenatal clinic                  | Passive haemagglutination test (PHA)                                 | 0                          |
| Reis et al (105)            | Toxoplasma          | Brazil     | 61.10% | 10468 | Hospitals                         | Fluorometric tests, with IgM capture                                 | 2006                       |
| Harma et al (106)           | Toxoplasma IgG      | Turkey     | 60.40% | 1149  | Prenatal clinic                   | ELISA                                                                | 2004                       |
|                             | Toxoplasma          | .          | 3.00%  |       |                                   |                                                                      |                            |

|                      |                |              |                             |                                                  |                     |                                                                      |                       |
|----------------------|----------------|--------------|-----------------------------|--------------------------------------------------|---------------------|----------------------------------------------------------------------|-----------------------|
|                      | IgM            |              |                             |                                                  |                     |                                                                      |                       |
| Hou et al (107)      | Toxoplasma     | China        | 5.50%                       | 347                                              | No information      | Indirect haemagglutination (IHA)                                     | March and August 1996 |
| Doehring et al (108) | Toxoplasma     | Tanzania     | 0.8% check result with Igor | 849                                              | No information      | Sabin-feldman dye test (DT) and an immunosorbent agglutination assay | 1995                  |
| Soto et al (109)     | Toxoplasma     | Venezuela    | 53.91%                      | 7969                                             | No information      | Indirect haemagglutination                                           | 0                     |
| Franklin et al (110) | Toxoplasma     | Israel       | 21.00%                      | 213                                              | Antenatal clinic    | Immunofluorescent antibody test                                      | 1988-1989 (16 months) |
| Khurana et al (69)   | Toxoplasma IgG | India        | 15.33%                      | 300                                              | No information      | ELISA                                                                | January 2005 to 2006  |
|                      | Toxoplasma IgM |              | 3.00%                       |                                                  |                     |                                                                      |                       |
| Ouermi et al (111)   | Toxoplasma IgG | Burkina Faso | 27.20%                      | 276 (HIV infected and uninfected pregnant women) | Healthcare facility | ELISA                                                                | January to June 2009  |
|                      | Toxoplasma IgM |              | 4.70%                       |                                                  |                     |                                                                      |                       |
| Hammouda et al (112) | Toxoplasma     | Egypt        | 65.00%                      | 100                                              | No information      | ELISA                                                                | 1993                  |
|                      | CMV            |              | 51.00%                      |                                                  |                     |                                                                      |                       |
