# Supplementary material for: Epidemiology and aetiology of maternal parasitic infections in low- and middle-income countries
Source: PubMed Central journal article supplement (PMC3484768), 2011-12
Supplement: jogh-01-189-s004.pdf [file jogh-01-189-s004.pdf]

**Supplementary Table 4.** Summary of data extracted from studies reporting prevalence of maternal infection with Chagas disease (n=7)

| Author                   | Country                                  | Prevalence | Numbers in study | Study setting    | Tests used                                                                                                   | Study dates                   |
|--------------------------|------------------------------------------|------------|------------------|------------------|--------------------------------------------------------------------------------------------------------------|-------------------------------|
| Araujo et al (4)         | Brazil                                   | 0.30%      | 351              | Patients         | Antibodies in umbilical cord                                                                                 | 2009                          |
| Arancibia et al (5)      | Chile                                    | 2.10%      | 2063             | Non-endemic area | Indirect immunofluorescence test (iift)                                                                      | 1991-1993                     |
| Arcavi et al (6)         | Argentina                                | 8.50%      | 729              | Non-endemic area | Indirect hemagglutination and indirect immunofluorescence                                                    | Jan 1990- Feb 1991            |
| Mendoza Ticona et al (7) | Peru                                     | 0.73%      | 3000             | Endemic areas    | Indirect immunofluorescence (iif), (elisa) testing and titration of immunoglobulin g (igg) antibodies by iif | December 2001 - July 2002     |
| Sosa-Estani et al (8)    | Argentina, Bolivia, Honduras, and Mexico | 5.50%      | 2495             | Endemic areas    | ELISA                                                                                                        | 2008                          |
| Torricono et al (9)      | Bolivia                                  | 26.30%     | 2124             | Hospital         | No information                                                                                               | 2004                          |
| Arcavi et al (6)         | Argentina                                | 8.50%      | 729              | No information   | Indirect haemagglutination and indirect immunofluorescence tests.                                            | January 1990 to February 1991 |
