# Supplementary material for: Epidemiology and aetiology of maternal parasitic infections in low- and middle-income countries
Source: PubMed Central journal article supplement (PMC3484768), 2011-12
Supplement: jogh-01-189-s005.pdf [file jogh-01-189-s005.pdf]

**Supplementary Table 5** Summary of data extracted from studies reporting prevalence of maternal infection with trichinellosis (n=1)

| <b>Author</b>            | <b>Pathogen</b> | <b>Country</b>                   | <b>Prevalence</b> | <b>Numbers in study</b> | <b>Study setting</b> | <b>Diagnostic test used</b> | <b>Year studied</b> |
|--------------------------|-----------------|----------------------------------|-------------------|-------------------------|----------------------|-----------------------------|---------------------|
| Taybouavone. et al (118) | Trichinello sis | Lao Peoples' Democratic Republic | 2.00%             | 200                     | No information       | Western Blot                | 2006                |
