# Supplementary material for: Epidemiology and aetiology of maternal parasitic infections in low- and middle-income countries
Source: PubMed Central journal article supplement (PMC3484768), 2011-12
Supplement: jogh-01-189-s006.pdf [file jogh-01-189-s006.pdf]

**Supplementary Table 6.** Summary of data extracted from studies reporting prevalence of maternal infection with *Trichomonas vaginalis* (n=4)

| Author               | Pathogen                     | Country   | Prevalence | Numbers in study | Study setting  | Diagnostic test used                          | Year studied |
|----------------------|------------------------------|-----------|------------|------------------|----------------|-----------------------------------------------|--------------|
| Perazzi et al (113)  | <i>Trichomonas vaginalis</i> | Argentina | 4.00%      | 597              | No information | culture on liquid medium                      | 2005         |
| Stringer et al (114) | <i>Trichomonas vaginalis</i> | Africa    | 18.00%     | 2428             | No information | analysed data from HPTN 024                   | 2010         |
| Azargoon et al (115) | <i>Trichomonas vaginalis</i> | Iran      | 5.50%      | 1223             | Hospital       | vaginal pH, saline wet mount, and Amsel tests | 2006         |
| Ogbonna et al (116)  | <i>Trichomonas vaginalis</i> | Nigeria   | 37.60%     | 250              | Urban          |                                               | 2000         |
|                      |                              | .         | 24.80%     | 250              | Rural          |                                               |              |
| Assefa et al (117)   | <i>Trichomonas vaginalis</i> | Congo     | 18.60%     | 215 HIV +        | No information | culture                                       | 2010         |
|                      |                              |           | 10.20%     | 206 HIV -        |                |                                               |              |
